# Supplementary material for: Tunable Topological Dirac Surface States and Van Hove Singularities in Kagome Metal GdV6Sn6
Source: Research Square preprint supplement (doi:10.21203/rs.3.rs-1529357/v1), 2022-04-14
Supplement: Supplementary file 1 [file cbc7eacc66fcf3a0036ae1fa.docx]

**Supplementary Materials**

**Tunable Topological Dirac Surface States and Van Hove Singularities**

**in Kagome Metal GdV6Sn6**

Yong Hu1,#,*, Xianxin Wu2,#, Yongqi Yang3, Nicholas C. Plumb1, Andreas P. Schnyder2, Weiwei Xie3, Junzhang Ma4,5,6*, and Ming Shi1,*

*1Swiss Light Source, Paul Scherrer Institute, CH-5232 Villigen PSI, Switzerland*

*2Max-Planck-Institut für Festkörperforschung, Heisenbergstrasse 1, D-70569 Stuttgart, Germany*

*3Department of Chemistry and Chemical Biology, Rutgers University, 08854, Piscataway, USA*

*4Department of Physics, City University of Hong Kong, Kowloon, Hong Kong, China*

*5City University of Hong Kong Shenzhen Research Institute, Shenzhen, China*

*6Hong Kong Institute for Advanced Study, City University of Hong Kong, Kowloon, Hong Kong, China*

#These authors contributed equally to this work.

*To whom correspondence should be addressed:

Y.H. (yonghphysics@gmail.com); J.-Z.M. (junzhama@cityu.edu.hk); M.S. (ming.shi@psi.ch)

**Contents**

1. *p*-type and *m*-type VHSs in GdV6Sn6

2. Density functional theory calculations for surface states in GdV6Sn6

3. Analysis of the two terminations based on XPS spectra

4. Dirac cone and VHS endemic to the kagome lattice of GdV6Sn6

5. Detailed comparison between the experimental and theoretical band dispersions

6. Photon energy-dependent measurements on the surface states

7. Projections of surface states on GdSn2 and kagome terminated surface

8. Momentum-dependent dispersions of the TDSSs

9. Spin texture of the TDSSs from DFT calculations

10. Electronic structure of GdV6Sn6 in ferromagnetism

**1. *p*-type and *m*-type VHSs in GdV6Sn6**

The vanadium kagome lattice of the kagome metal GdV6Sn6 hosts three distinct sublattices located at 3f Wyckoff positions, as illustrated in Fig. S1a. The toy band of the kagome lattice features two different types of van Hove singularities (VHSs): *p*-type and *m*-type. For the *p*-type VHS, the eigenstates near the three M points are contributed by mutually different sublattices [Fig. S1b(i)], while the states of the *m*-type VHS are equally distributed over mutually different sets of two sublattices for each M point [Fig. S1b(ii)]. The orbitally decomposed electronic structure of GdV6Sn6 from DFT calculations is displayed in Fig. S1c, where four VHS points occur at M in the vicinity of *EF* (indicated by the red arrows and labeled as VHS1-4). The states of VHS1, VHS2 and VHS3 at M point are characterized by V *dxz*, *dxy* and *dz2* orbitals, and are solely attributed to one sublattice in the V kagome lattice. Thus, the three VHSs are of *p*-type, while the states of VHS4 at M point are attributed to a mixture of two sublattices and VHS4 is of *m*-type.


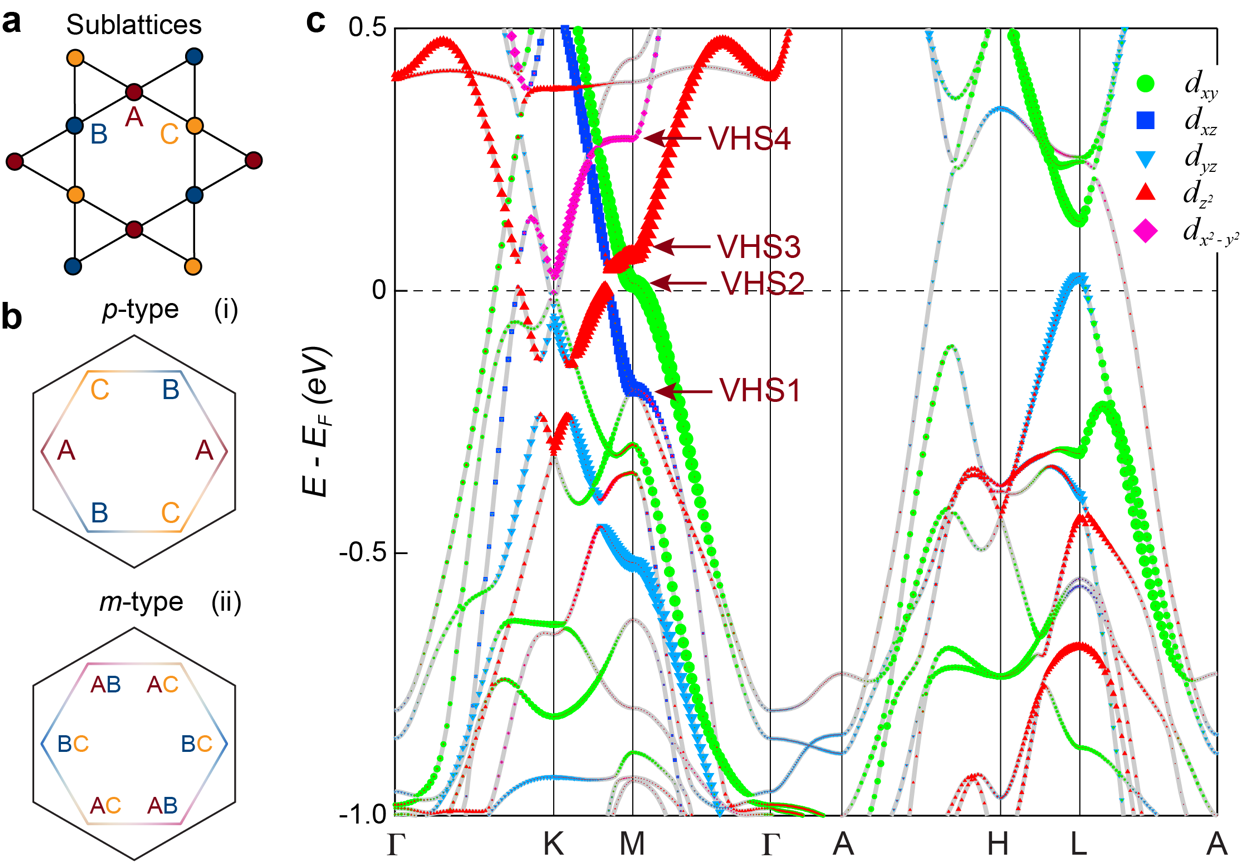


**Fig. S1|Sublattice feature and van Hove singularities in kagome metals GdV6Sn6. a** Real space structure of the vanadium kagome planes. The red, blue and green coloring indicates the three kagome sublattices. **b** Two distinct types of sublattice decorated van Hove singularities (VHSs), labeled as *p*-type [sublattice pure, (i)] and *m*-type [sublattice mixing, (ii)]. **c** DFT calculations for theorbital character resolved band structure of GdV6Sn6.

**2. Density functional theory calculations for surface states in GdV6Sn6**

We have directly studied the surface states on (001) surface of GdV6Sn6 by performing calculations on a slab with two kind of surface terminations, which contains 10 V kagome layers and 5 GdSn2 layers. As shown in Fig. S2, the electronic structure of GdV6Sn6 exhibits distinct surface states on the GdSn2 (the red curves in Figs. S2a and S2b) and kagome terminations (the blue curves in Figs. S2a and S2c). More interestingly, the Dirac surface states on the GdSn2 layer bridge the large local band gap at , which represent the topologically non-trivial Dirac surface states (TDSSs) originating from a ℤ2 bulk topology. The general shape of this surface state is in good agreement with ARPES measurements.


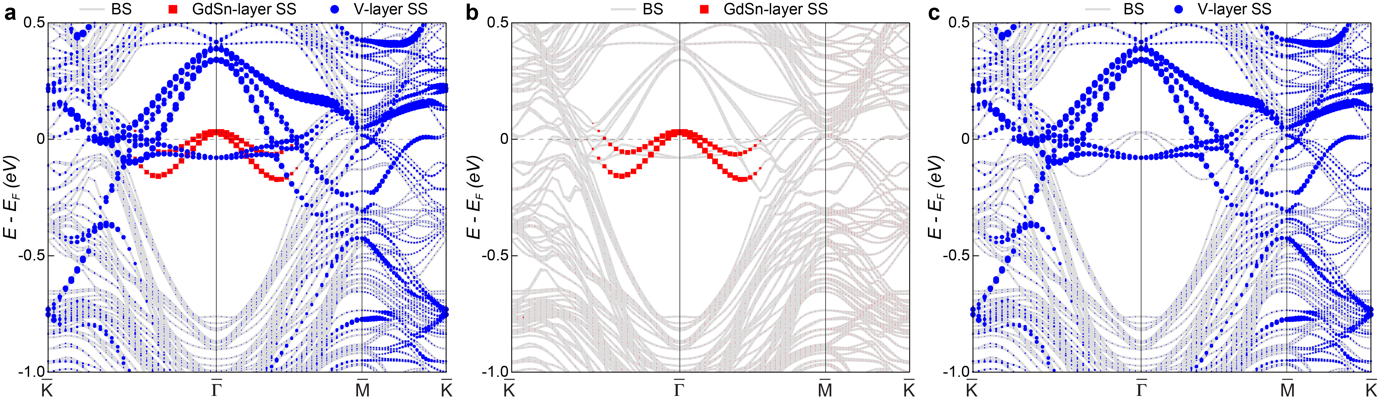


**Fig. S2|Surface states decomposed band structure of GdV6Sn6 from DFT calculations. a** Band structure of GdV6Sn6, with bulk states (BS) and surface states (SS) decomposed. **b,c** Electronic structure on GdSn2 layer (b) and V kagome layer (c). Red and blue curves indicate the SS on GdSn2 layer and kagome layer, respectively.

**3. Analysis of the two terminations based on XPS spectra**

By using a small beam spot, we have resolved two sets of representative photoemission spectra (Fig. 2 in the main text) associated with the two types of terminations on the cleaved sample surface of GdV6Sn6 (as illustrated in Figs. S3a and S3e). As shown in Figs. S3b and S3f, the X-ray photoelectron spectroscopy (XPS) clearly shows the characteristic 3*s*, 3*p* peaks of V, 4*f* peak of Gd, and 4*d* peaks of Sn, exhibiting two distinct spectra on the Sn 4*d* core level (Figs. S3c and S3g). Following the strategy in the kagome lattice FeSn [1], the XPS spectra of the Sn-4*d* peaks are used to determine the surface terminations of the sample. It has been found in FeSn that Sn atoms in different local environments can contribute 4*d* peaks with different binding energies [1,2]. Since Sn atoms near the kagome termination (Fig. S3a) have more complex local environments, they should in principle exhibit prominent side peaks of Sn. Therefore, we assign the XPS spectra showing more Sn-4*d* peaks to the kagome termination (Figs. S3a-d), while another set of spectra represents the GdSn2 termination (Figs. S3e-h).

Intriguingly, the intensity of the Gd-4*f* peak in the determined GdSn2 termination (Fig. S3h) is stronger than that in the kagome termination (Fig. S3d). Moreover, the observed TDSSs on the determined GdSn2 termination are excellent agreement with the DFT calculations for GdSn2 layer (see Fig. 3 and Fig. 4 in the main text), further confirming the assignments of the terminations. While all results show good agreement, the unambiguous determination of the surface termination should come from a combination of *in-situ* scanning tunneling microscopy (STM) and ARPES techniques, which is not very necessary for the present work. The termination assignments do not affect the main conclusions of the tunable TDSSs and VHSs in GdV6Sn6.


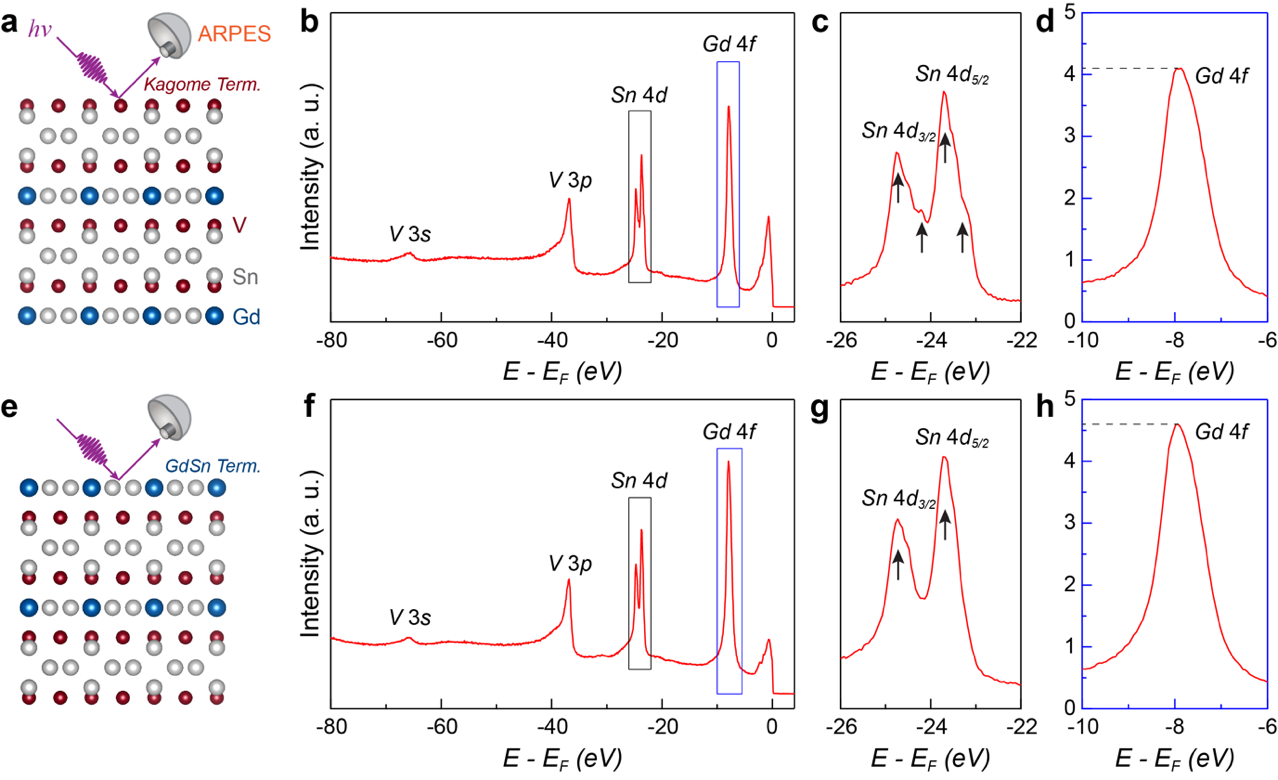


**Fig. S3|Determination of surface terminations of GdV6Sn6 using XPS. a** Schematics of the kagome termination in GdV6Sn6. **b** Wide-energy-range XPS spectrum of GdV6Sn6 measured with 170 *eV* photon. **c,d** Zoom-in plot of the spectrum highlighting Sn-4*d* peaks (c) and Gd-4*f* peak (d) in selected energy regions in (b), as indicated by the black and blue box, respectively. **e-h**, Same as (a-d), but for the GdSn2 termination.

**4. Dirac cone and VHS endemic to the kagome lattice of GdV6Sn6**

The kagome structural motif could naturally give rise to kagome-derived electronic bands with Dirac cone and VHS. Indeed, we have identified the characteristic Dirac cone and VHS point of the kagome lattice on the kagome termination of GdV6Sn6 (Fig. S4). As shown in Fig. S4a, the Dirac cone is clearly observed around‾K point, at the binding energy (*EB*) around 200 *meV* (see the red arrow). Interestingly, after surface potassium deposition, the Dirac cone persists while trivial surfaces are killed (Fig. S4b), indicating the bulk origin and robustness of the Dirac fermions. Moreover, VHS is also revealed near‾M point (Fig. S4c), as confirmed by the calculations (Fig. S4d). The identified Dirac cone and VHS on the kagome termination are consistently observed on the GdSn2 termination, unambiguously confirming that they are bulk states native to the kagome lattice of GdV6Sn6 (for details, see Fig. S5).


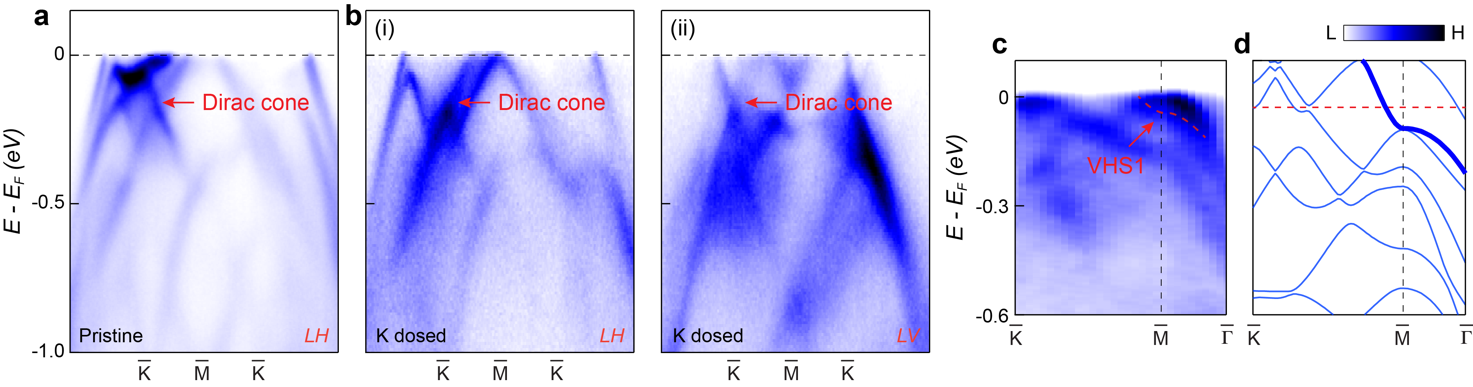


**Fig. S4|Dirac cone and VHS in GdV6Sn6.a** ARPES spectra taken along the‾K -‾M -‾K direction, on the pristine kagome surface, measured with 76 *eV* linear horizontal (*LH*) polarization. **b** Same as (a), but collected on the K dosed kagome surface, measured with 76 *eV* *LH* (i) and linear vertical (*LV*) (ii) polarizations. Red arrow highlights the Dirac cone. Arrow indicates the VHS1 band. **f** Same as (e), but measured on the K dosed kagome surface. **c** ARPES spectrum along the‾K -‾M -‾ path showing the VHS1 at the‾M point, obtained on kagome surface. **d** Same as (c), but from DFT calculations.

**5. Detailed comparison between the experimental and theoretical band dispersions**

We compare the ARPES spectra obtained on the GdSn2 termination with the DFT calculated energy band dispersions in Fig. S5. Figures S5a and S5b display the band structure of GdV6Sn6 in the paramagnetic phase from DFT calculations. We next focus on two high symmetry cuts along the‾ -‾K -‾M -‾K direction (the momentum path is represented by the blue line in Fig. S5c, as marked as Cut#1) and the‾ -‾M direction (Cut#2 in Fig. S5c), as shown in Figs. S5d,5e and Figs. S5f,5g, respectively. The experimental and calculated bands show good overall agreement, although there are discrepancies in Fermi levels between the experimental (the red dashed line in Figs. S5e, S5g) and calculated (the black dashed line in Fig. S5e, S5g) results. The agreement between experiments and calculations allows us to determine that the identified VHS (Fig. 2k in the main text, and Figs. S5h,5i) is corresponding to the VHS1 (Figs. S5a and S5j).

The experimentally determined oribital character of the bands that form the VHS1 is also consistent with the DFT calculations. Under our ARPES geometry (for details, see Refs. 3,4), according to the selection rules, the bands with *dxz* character along the‾ -‾K and‾ -‾M paths are favored under the linear vertical (*LV*) and linear horizontal (*LH*) polarizations, respectively. Indeed, the VHS1 bands are observable under the *LV* polarization in Fig. S5d(iii) and the *LH* polarization in Fig. S5f(i). Therefore, the experimental VHS1 bands are contributed by Vanadium *dxz* orbital (as indicated in Figs. S5h,5i) and derived from kagome bulk states, which are in line with the DFT calculations for the orbital character resolved band structure (Figs. S5b and S5j).


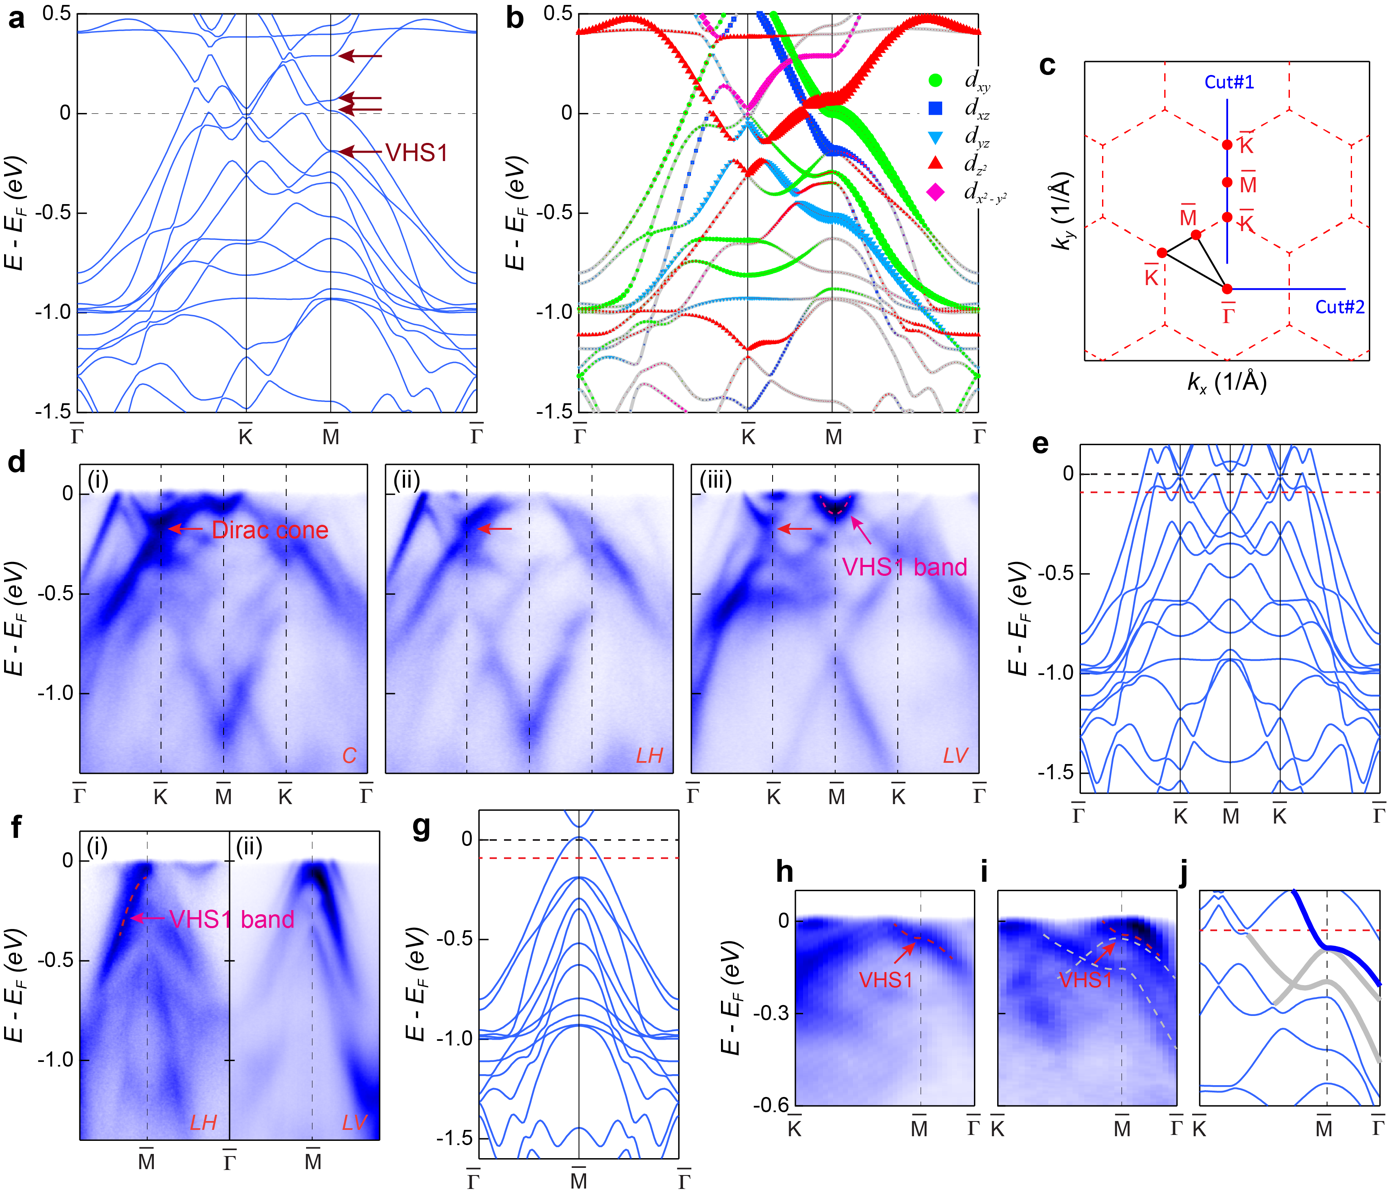


**Fig. S5|Comparison between the experimental and theoretical dispersions in GdV6Sn6. a** DFT calculated electronic structure, with VHSs indicated. **b** Orbitally decomposed electronic structure. **c** Brillouin zone (BZ) of GdV6Sn6, with high symmetry points marked. **d** ARPES spectra taken along the‾ -‾K -‾M direction, on the pristine surface, measured with 76 *eV* circular (*C*) (i), *LH* (ii), *LV* (iii) polarizations. The momentum path for (d) is indicated by the blue line in (c). **e** Theoretical dispersion along the‾ -‾K -‾M direction. **f** ARPES spectra taken along the‾ -‾M direction, measured with 76 *eV* *LH* (i), *LV* (ii) polarizations. **g** Theoretical bands along the‾ -‾M direction. **h-j** Band dispersion from the GdSn2 termination (h), kagome termination (i), and DFT calculations (j), along the‾K -‾M -‾ path showing the VHS1 at the‾M point.

**6. Photon energy-dependent measurements on the surface states**


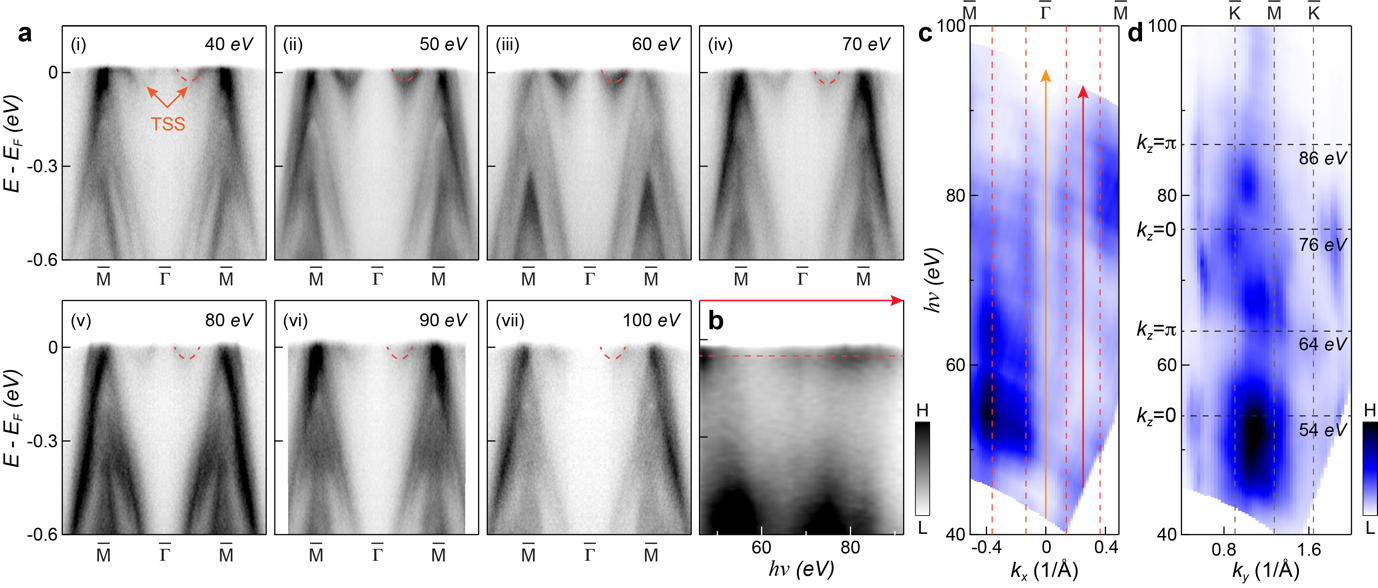


**Fig. S6|Photon energy-dependent measurements on the GdSn2 termination. a** Photon energy-dependent AREPS spectra along the‾M -‾ -‾M direction. Red dashed curves and arrows highlight the V-shaped TDSSs. In contrast to the bulk states, the V-shaped bands around‾does not disperse with photon energies, reflecting their surface nature. **b** ARPES spectral intensity as a function of photon energy along the  - A direction. **c** Photon energy-dependent ARPES spectral intensity map at *EF* along the‾M -‾ -‾M direction, where the red dashed lines indicate the TDSSs that show no dispersion along the energy (and thus *kz*) direction. Red and yellow arrows mark the momentum direction of the spectrum in (b) and Fig. S8(c) respectively. **d** Same as (c), but measured along the‾K -‾M -‾K direction. In contrast to the TDSSs in (c), the bulk states exhibit pronounced *kz* dispersions.

**7. Projections of surface states on GdSn2 and kagome terminated surface**

Figure S7 shows the spectra of bulk, GdSn2 terminated surface and V terminated surface. In the GdSn2 termination, the topological Dirac surface states can be clearly identified.


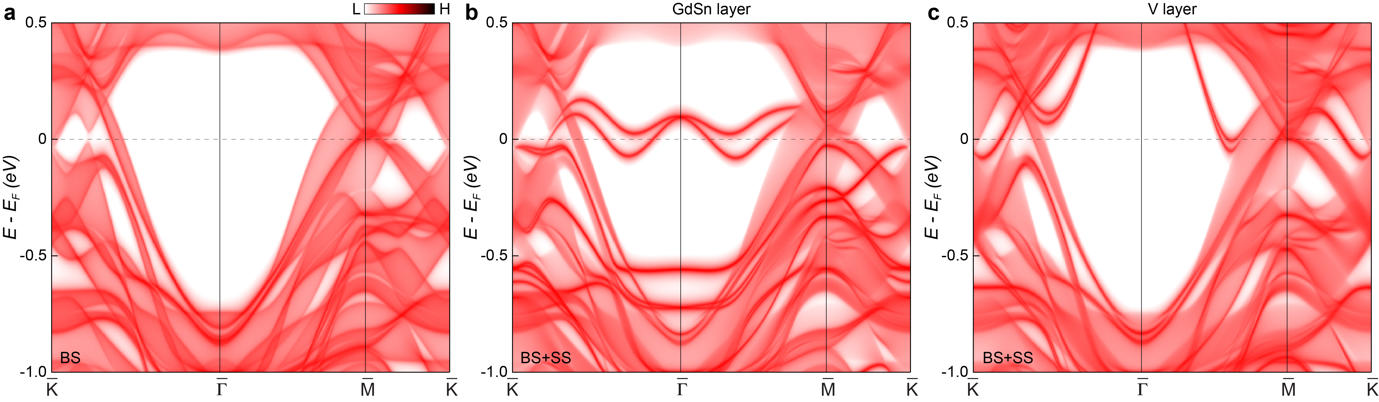


**Fig. S7|(001) surface states of GdV6Sn6 from DFT calculations. a-c** The (001) surface Green’s function projection of pure bulk states (BS)(a), the states [BS and surface states (SS)] on GdSn2 termination (b), and the states (BS+SS) on Vanadium kagome termination (c).

**8. Momentum-dependent dispersions of the TDSSs**

Revealing the details of the TDSSs in GdV6Sn6, Figure S8 displays the momentum dependence and photon energy dependence of the doped TDSSs on the K-dosed GdSn2 surface. Figure S8a plots the constant energy contours and their evolution with binding energy (*EB*). With increasing *EB*, the TDSSs contributed hexagonal-shaped pockets near the zone center (‾ point) shrink (Fig. S8a), reflecting their electron-like nature. Momentum-dependent dispersions of the TDSSs are shown in Fig. S8b. The Dirac point of TDSSs is clearly identified at the *EB* around 260 *meV* (Figs. S8a and S8b). In addition, photon energy-dependent measurement was also performed on the K-dosed GdSn2 surface. The ARPES spectrum along the  - A direction reveals a non-dispersive feature at the *EB* of the Dirac point, exhibiting the intrinsic two-dimensional nature the TDSSs. Remarkably, the lower branch of the TDSSs merges into the bulk bands [see Fig. 4d(iii) in the main text, and the red box selected region in Fig. S8d], and only the upper branch crosses the *EF*, which reverses the chirality of the spin texture at the Fermi surfaces, as we will demonstrate further in the next section.


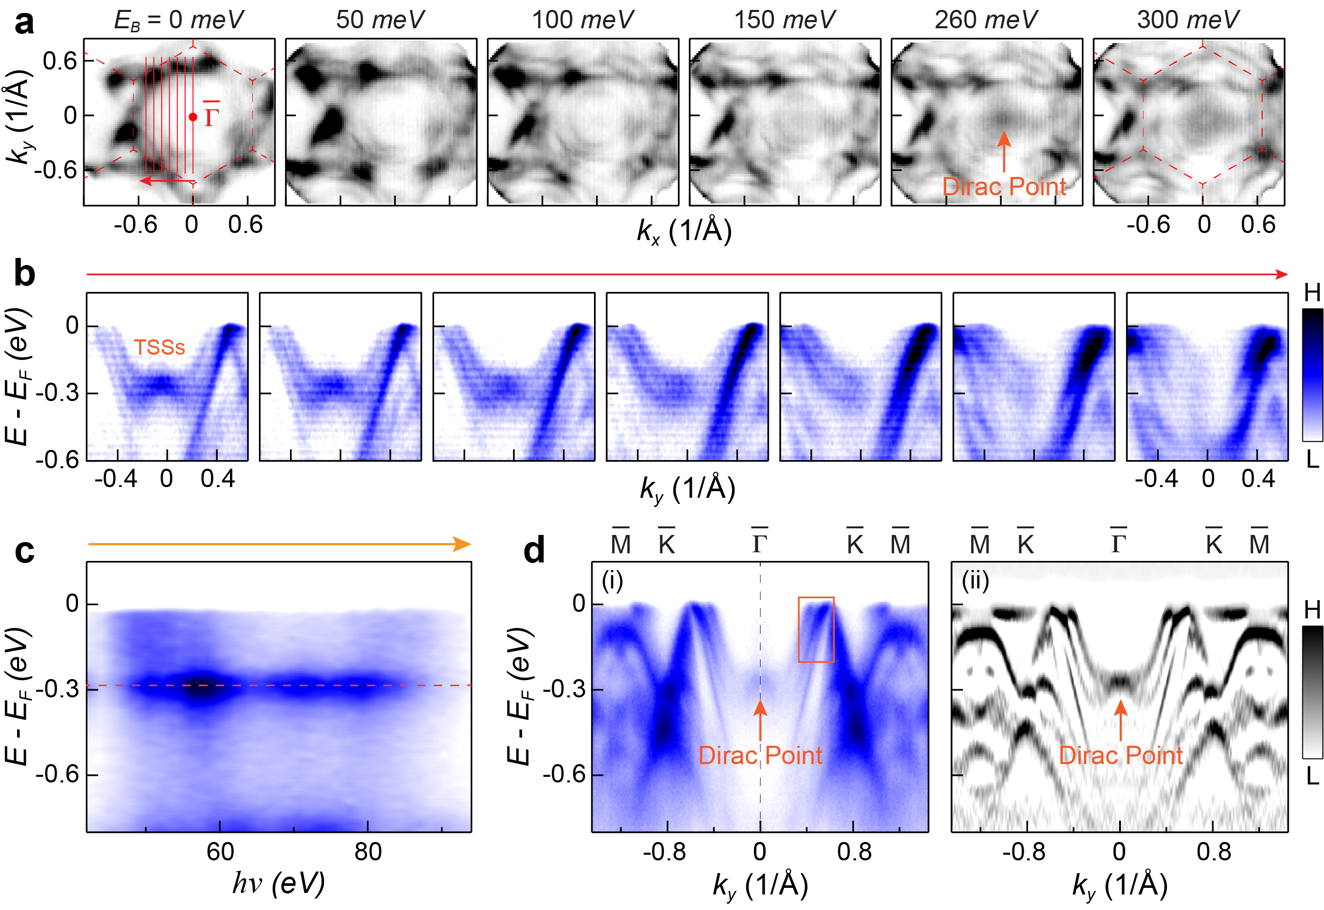


**Fig. S8|Momentum dependence and photon energy dependence of the doped TDSSs in GdV6Sn6. a** Constant energy contours at binding energies. **b** Momentum-dependent dispersions of the TDSSs. The corresponding momentum paths are indicated by the red lines in (a). **c** ARPES spectral intensity as a function of photon energy along the  - A direction.The momentum direction of the spectrum is marked by the yellow arrow in Fig. S6(c). **d** ARPES spectra taken along the‾ -‾K -‾M direction, measured with 86 *eV* *C* polarization. All data were collected on the K-dosed GdSn2 layer, at 20 *K*.

**9. Spin texture of the TDSSs from DFT calculations**

We examined spin textures of the TDSSs on the pristine and doped GdSn2 surface by the DFT calculations. Figure S9 plots the spin-resolved Fermi surfaces of the GdSn2 layer. On the pristine GdSn2 surface, only the lower branch of the TDSSs contributes to the Fermi surfaces, i.e., the circular-shaped and hexagonal-shaped pockets around‾ point (Fig. S9a, and Figs. 3e,3f in the main text). Our calculations suggest that the circular-shaped and hexagonal-shaped Fermi surfaces have clockwise spin texture chirality (Fig. S9a). Upon sufficient electron doping [Fig. 4c(iii) in the main text, and Fig. S8], the Dirac point of the TDSSs can be tuned below the *EF*. Therefore, both the lower and upper branches of the doped TDSSs contribute to the Fermi surfaces. However, the lower branch merges into the bulk bands [Fig. 4d(iii) in the main text, Figs. S8d and S9b], so that the corresponding Fermi surface has counterclockwise spin texture chirality (Fig. S9b). These results clearly demonstrate the spin polarization reversal on the Fermi surfaces of GdV6Sn6 with doping.


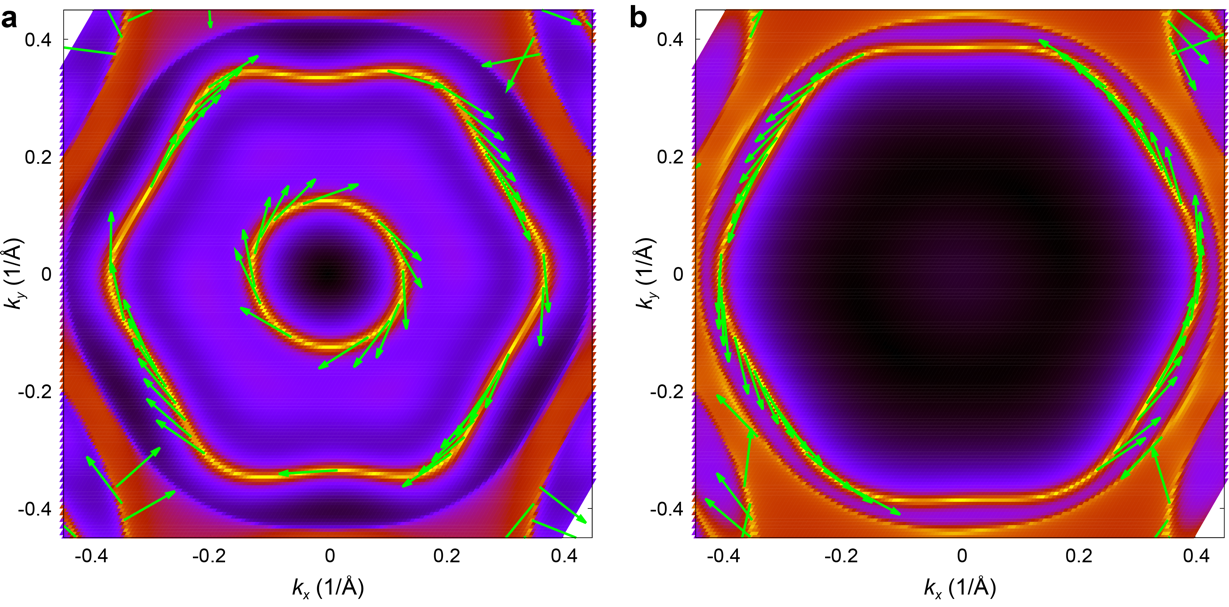


**Fig. S9|Spin texture of the TDSSs from DFT calculations. a,b** Spin textures of the TDSSs on the pristine (a) and doped (b) GdSn2 surface. Green arrow indicates the spin-polarization direction of the TDSSs.

**10. Electronic structure of GdV6Sn6 in ferromagnetism**

Figure S10 shows the electronic structure in the ferromagnetic state. The magnetic moment of Gd atom is about 7 μB. As the states near the Fermi level is dominated by V d orbitals, the magnetic splitting originating from the coupling between V kagome and Gd layers is relatively small but visible.


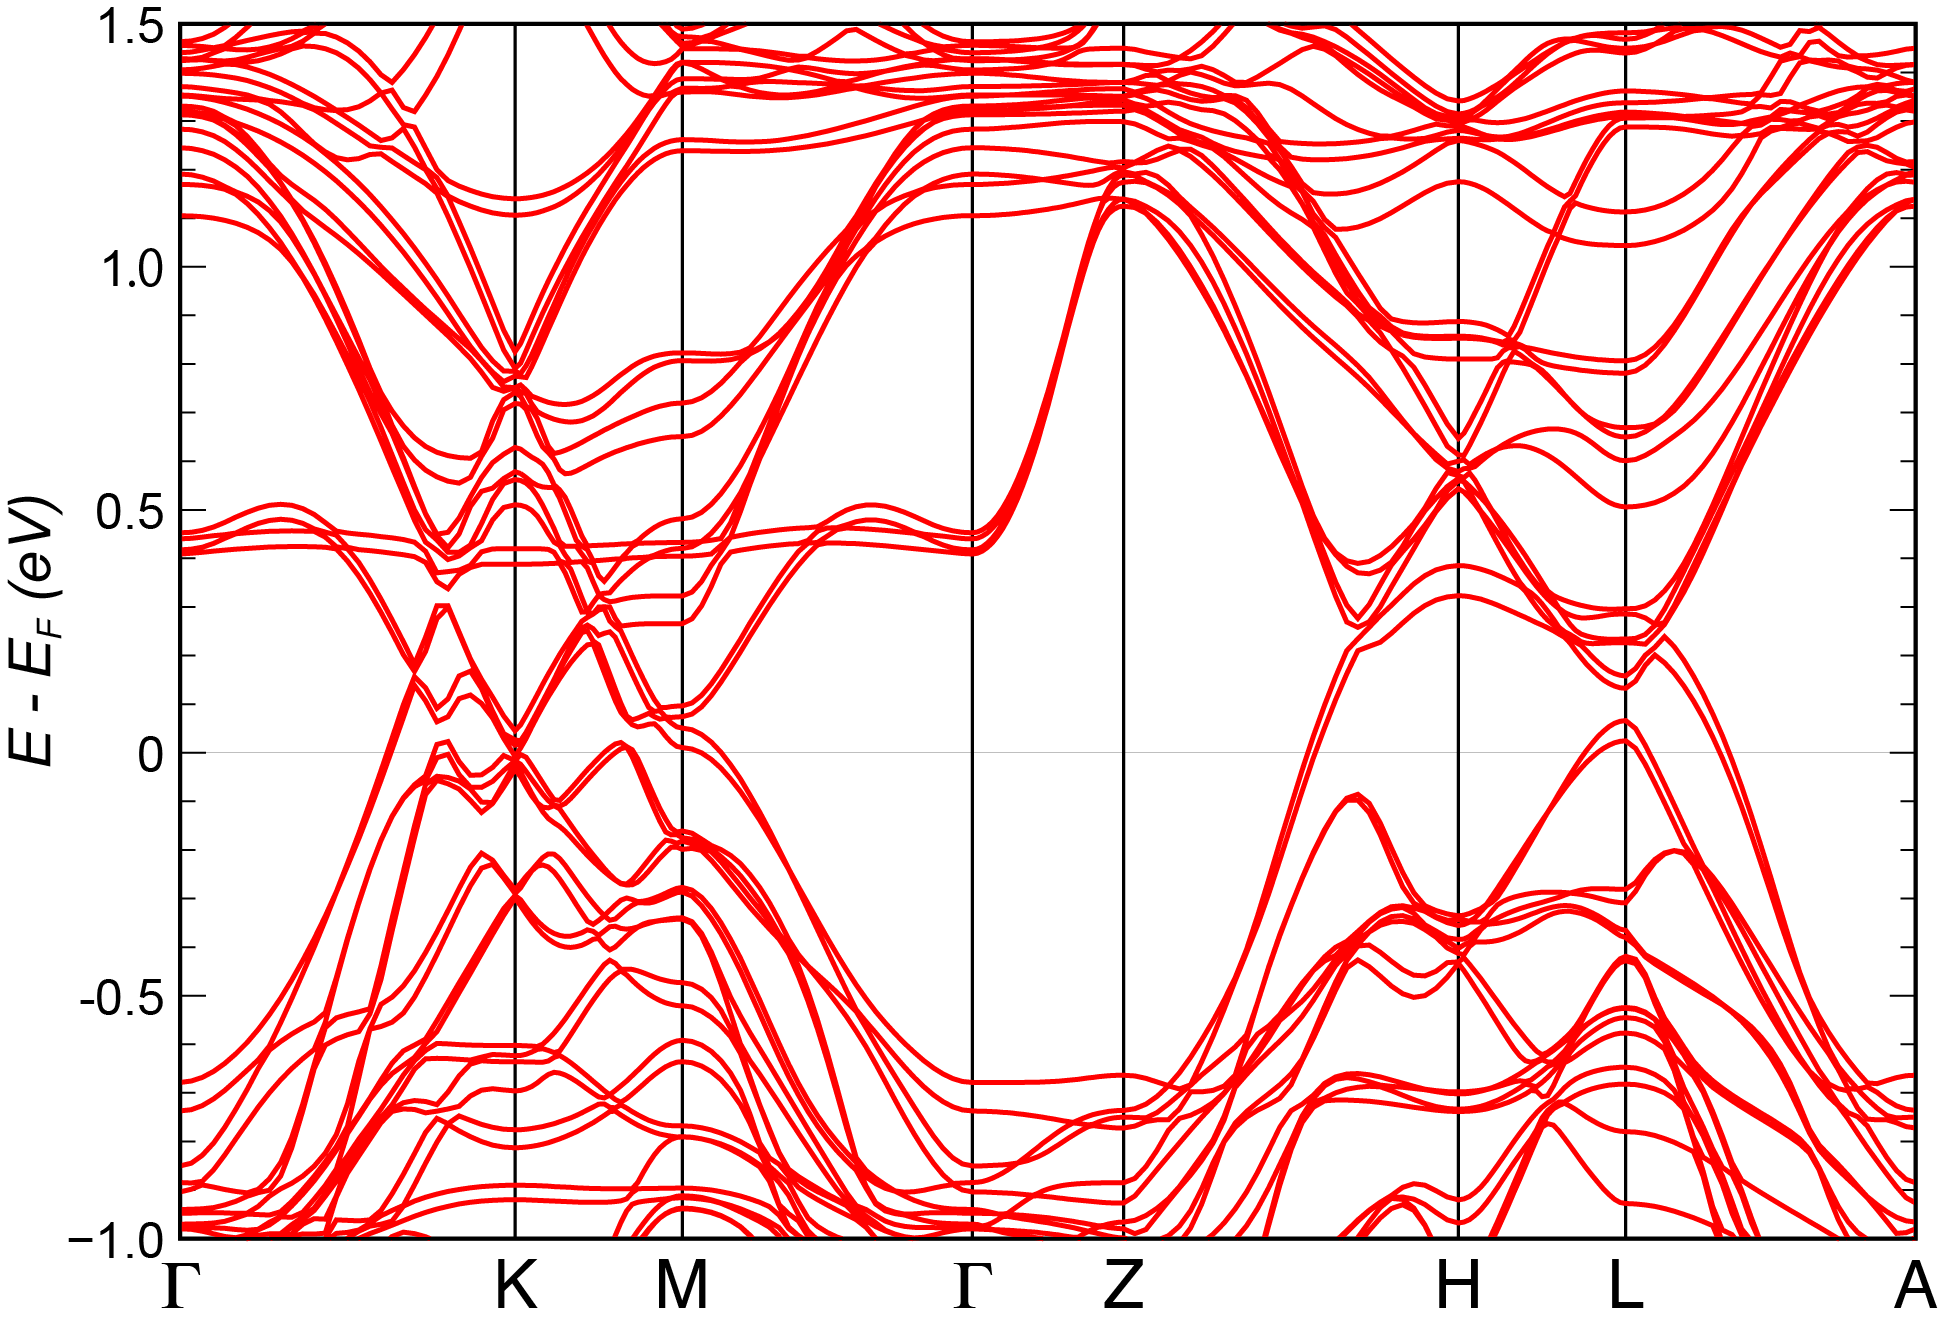


**Fig. S10|DFT calculated electronic structure of GdV6Sn6 in ferromagnetism.**

**References**

[1] M. Kang, L. Ye, S. Fang, J.-S. You, A. Levitan, M. Han, J. I. Facio, C. Jozwiak, A. Bostwick, E. Rotenberg, M. K. Chan, R. D. McDonald, D. Graf, K. Kaznatcheev, E. Vescovo, D. C. Bell, E. Kaxiras, J. Brink, M. Richter, M. P. Ghimire, J. G. Checkelsky, and R. Comin, Dirac fermions and flat bands in the ideal kagome metal FeSn, *Nat. Mater.***19**, 163–169 (2020).

[2] S. Peng, Y. Han, G. Pokharel, J. Shen, Z. Li, M. Hashimoto, D. Lu, B. R. Ortiz, Y. Luo, H. Li, M. Guo, B. Wang, S. Cui, Z. Sun, Z. Qiao, S. D. Wilson, and J. He, Realizing Kagome Band Structure in Two-Dimensional Kagome Surface States of RV6Sn6 (R=Gd,Ho), *Phys. Rev. Lett.* **127**, 266401 (2021).

[3] Y. Hu, X. Wu, B. R. Ortiz, S. Ju, X. Han, J. Z. Ma, N. C. Plumb, M. Radovic, R. Thomale, S. D. Wilson, A. P. Schnyder, and M. Shi, Rich nature of van Hove singularities in kagome superconductor CsV3Sb5, Preprint at arXiv:2106.05922 (2021).

[4] Y. Hu, X. Wu, B. R. Ortiz, X. Han, N. C. Plumb, S. D. Wilson, A. P. Schnyder, and M. Shi, Coexistence of Tri-Hexagonal and Star-of-David Pattern in the Charge Density Wave of the Kagome Superconductor AV3Sb5, Preprint at arXiv:2201.06477 (2022).
